# Supplementary material for: Wound-induced polyploidization is dependent on Integrin-Yki signaling
Source: PubMed Central journal article supplement (PMC7860123; doi:10.1242/bio.055996), 2021-01-25
Supplement: biolopen-10-055996-s1.pdf [file biolopen-10-055996-s1.pdf]

**Table S1.** Raw data and analysis from graphs in Fig. 1D and 1I.

[Click here to Download Table S1](#)

**Table S2.** Raw data and analysis from graphs in Fig. 2D, 2H, 2L, 2P, and 2T.

[Click here to Download Table S2](#)

**Table S3.** Raw data and analysis from graphs in Fig. 3D, 3E, 3F, and 3K.

[Click here to Download Table S3](#)

**Table S4.** Raw data and analysis from graphs in Fig. S1E, S1H, and S1K.

[Click here to Download Table S4](#)

**Table S5.** Raw data and analysis from graph in Fig. S2D-F.

[Click here to Download Table S5](#)

**Table S6.** Raw data and analysis from graph in Fig. S3D.

[Click here to Download Table S6](#)

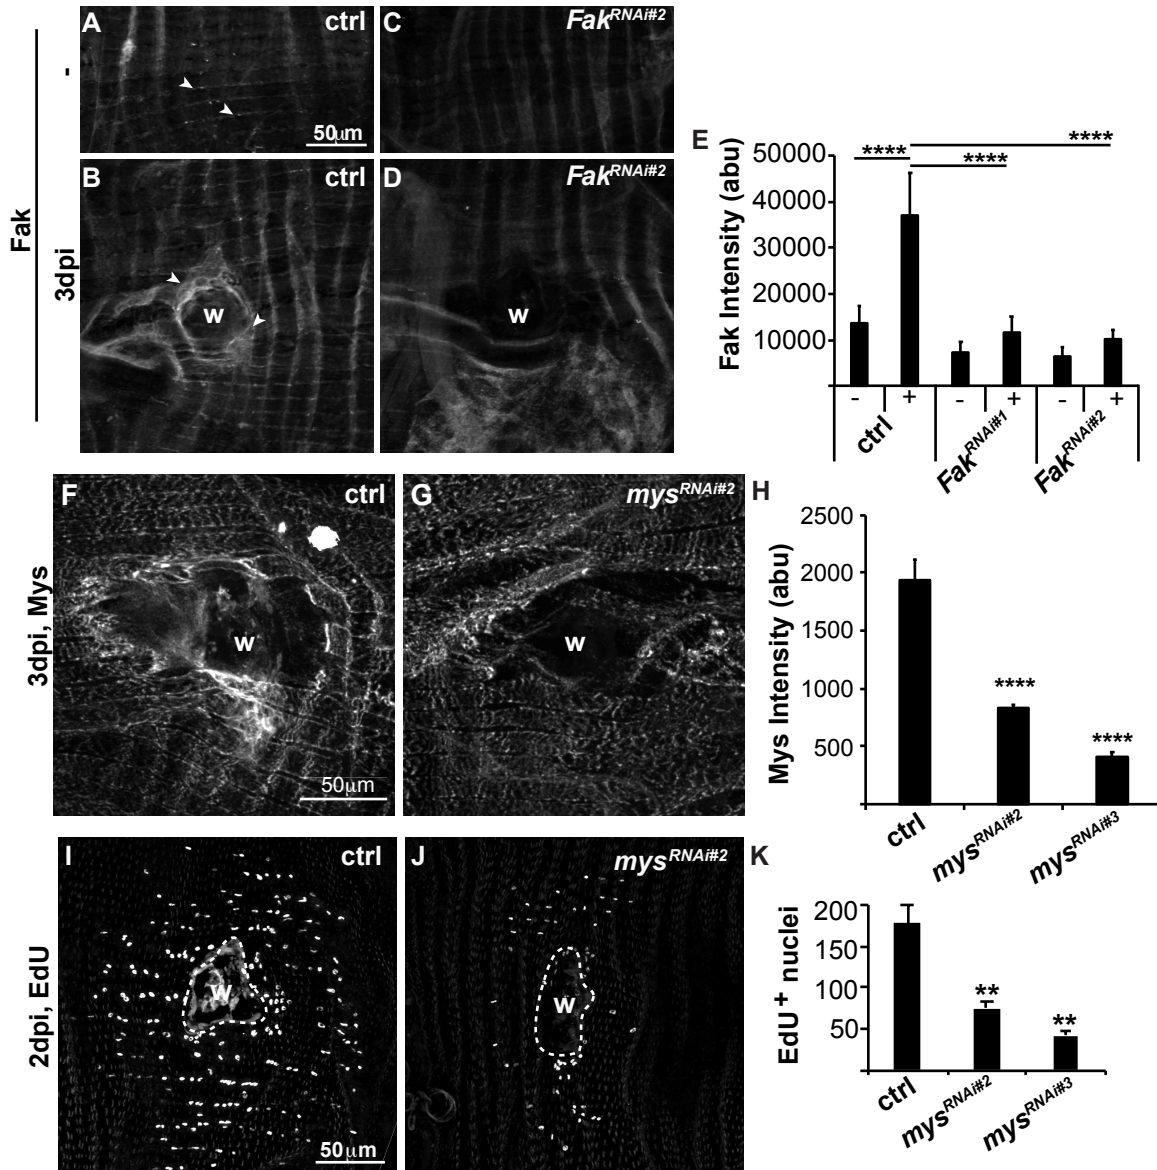

**Figure S1. Fak expression, RNAi verification, and mys dependent endoreplication.**

(A-D) Representative immunofluorescent images of Fak staining in the fly abdomen of the control (epi-Gal4/  $w^{1118}$ ) or Fak knockdown (epi-Gal4/UAS-Fak<sup>RNAi#2</sup>). Uninjured (-) and 3 dpi (+). Examples of epithelial Fak staining (arrowheads). Wound site (w). (E) Quantification of Fak epithelial expression in control (-, n=15 and +, n=11), Fak<sup>RNAi#1</sup> (-, n=12 and +, n=7), and Fak<sup>RNAi#2</sup> (-, n=9 and +, n=5). Error bars represent mean  $\pm$  SE and data were analyzed by two-tailed unpaired t-test. (F and G) Representative immunofluorescent images of Mys staining in fly abdomen at 3 dpi in control (epi-Gal/w<sup>1118</sup>) and mys<sup>RNAi#2</sup> (epi-Gal/UAS-mys<sup>RNAi#2</sup>) strains. Wound site (w). (H) Quantification of Mys intensity in control (n=13), mys<sup>RNAi#2</sup> (n=12), and mys<sup>RNAi#3</sup> (n=5). Error bars represent mean  $\pm$  SE and data were analyzed by two-tailed unpaired t-test,  $p < 0.001$  (\*\*\*). (I and J) Representative immunofluorescent images of EdU labeling (S phase cell cycle marker) at 2 dpi. Wound scar (outlined, w). (K) Quantification of EdU<sup>+</sup> epithelial nuclei in control (n= 9), mys<sup>RNAi#2</sup> (n=9), mys<sup>RNAi#3</sup> (n=9). Error bars represent mean  $\pm$  SE and data were analyzed by two-tailed unpaired t-test,  $p < 0.001$  (\*\*\*). Also see Source Data 4.

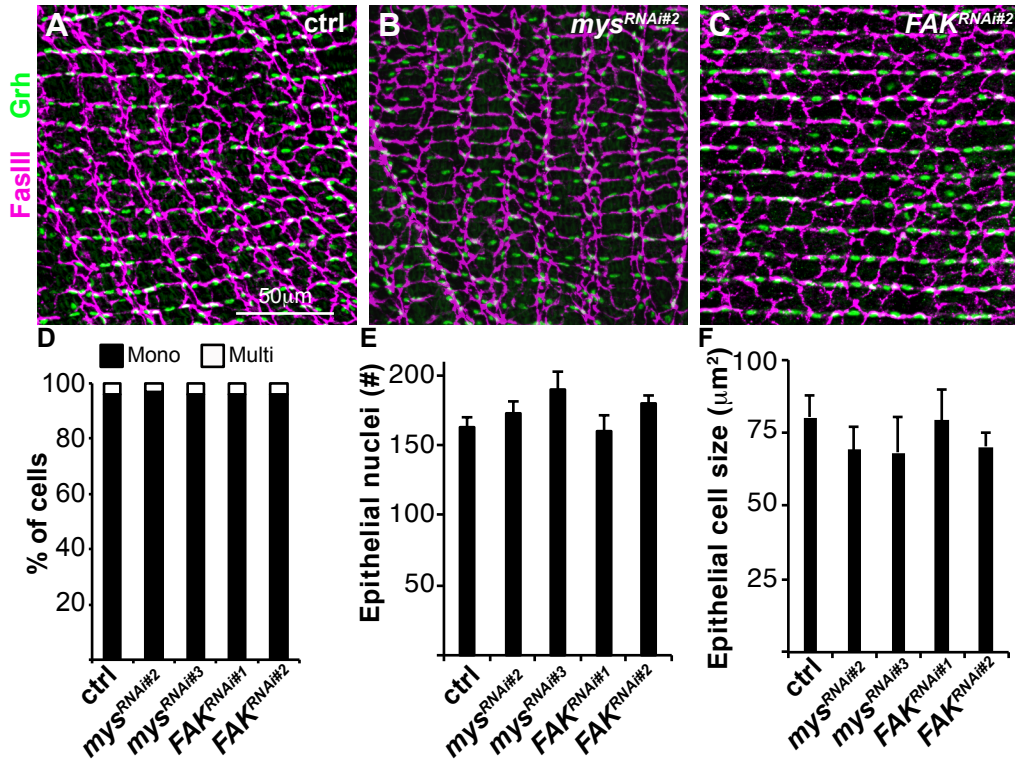

**Figure S2. Focal adhesion gene RNAi does not cause ectopic cell fusion.** (A-C)

Representative immunofluorescent images of FasIII and Grh staining in the uninjured fly abdomen from control, *mys*<sup>RNAi</sup>, and *Fak*<sup>RNAi</sup>. (D-F) Quantification of the number nuclei per cell (D), total number of epithelial nuclei (E), and epithelial cell size (F) for control (n=9), *mys*<sup>RNAi#3</sup>(n=9), *Fak*<sup>RNAi#1</sup>(n=9), *Fak*<sup>RNAi#2</sup> (n=8). There is no significant difference in the number of multinucleated cells, epithelial nuclei, or epithelial cell size. Error bars represent mean  $\pm$  SE and data were analyzed by two-tailed unpaired t-test. Also see Source Data 5.

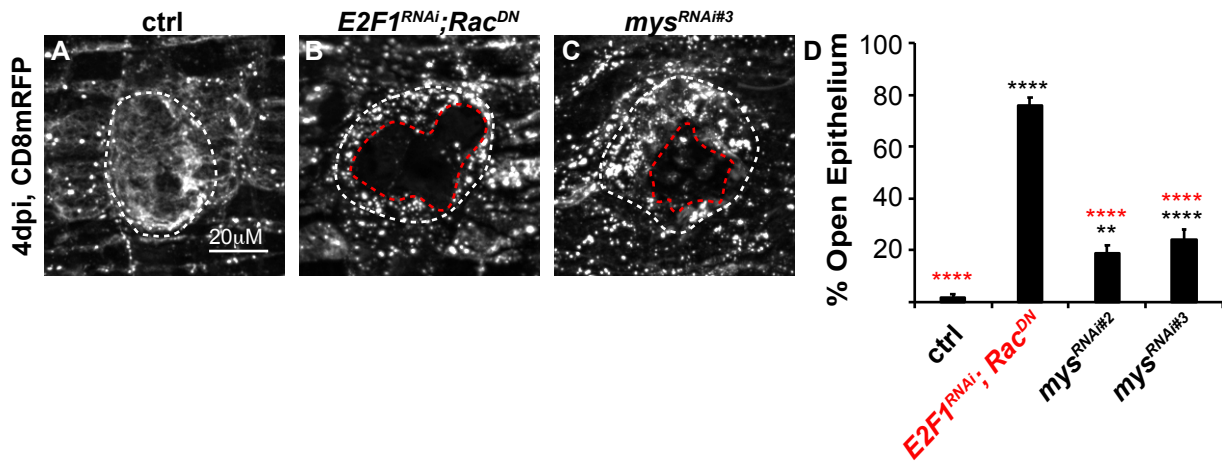

**Figure S3. *Mys* knockdown delays wound closure.** Re-epithelization during wound repair is detected by expression of a membrane-linked RFP (UAS-mCD8-RFP) under epi-Gal4 control. Representative immunofluorescent images for (A) control (epi-Gal4/+), (B) *E2F1<sup>RNAi</sup>; Rac<sup>DN</sup>*, and (C) *mys<sup>RNAi#3</sup>* at 4 dpi. Outlined are wound scar (dashed white line) and open epithelial area (dashed red line). (D) Percent open area (open epithelial area/ wound scar size) at 4 dpi for control (n=21), *E2F1<sup>RNAi</sup>; Rac<sup>DN</sup>* (n=15), *mys<sup>RNAi#2</sup>* (n=20), and *mys<sup>RNAi#3</sup>* (n=20). Data were analyzed by 1-way ANOVA with Tukey's multiple comparisons test \*\* (p<0.01) and \*\*\*\*(p<0.0001). Comparisons to control (black \*) and *E2F1<sup>RNAi</sup>; Rac<sup>DN</sup>* (red \*). Also see Source Data 6.
